# Supplementary material for: Achieving high aspect ratio wrinkles by modifying material network stress
Source: Royal Society of Chemistry journal article supplement (doi:10.1039/c7sm00469a), 2017-01-01
Supplement: c7sm00469a1.pdf [file c7sm00469a1.pdf]

## Achieving high aspect ratio wrinkles by modifying material network stress

### Supporting information

#### 1. Materials

The materials used to make the substrate and the films in this study. Their thickness and the Young's moduli are listed in Table S1.

Table S1. The thickness and Young's moduli of the materials used.

| Molding experiments       |                          | Post-curing experiments |                            |                           | Living silicone experiments |                           |
|---------------------------|--------------------------|-------------------------|----------------------------|---------------------------|-----------------------------|---------------------------|
| Film                      | Substrate                | Film                    | Substrate<br>(under-cured) | Substrate<br>(post-cured) | Film                        | Substrate                 |
| PAH/PSS                   | Sylgard 184<br>40:1      | Sylgard 184<br>5:1      | Sylgard 184<br>40:1        | Sylgard 184<br>40:1       | Momentive<br>LSR 7070       | Living silicone           |
| 80~120 nm                 | ~5mm                     | 2.5 ± 0.5 μm            | ~5mm                       | ~5mm                      | 8 ± 0.6 μm                  | ~2mm                      |
| 300 ± 30 MPa <sup>1</sup> | 40 ± 10 kPa <sup>a</sup> | ~1 MPa <sup>b</sup>     | 6 ± 2 kPa <sup>a</sup>     | 40 ± 10 kPa <sup>a</sup>  | 5.5 MPa <sup>c</sup>        | 389 ± 19 kPa <sup>2</sup> |

- Obtained with an Instron tensile tester. The material is molded into a 30x5x3 mm dogbone shape, and the test is performed at a displacement rate of 100 mm/min.
- Calculated using equation 1, with  $\lambda = 60 \mu\text{m}$ ,  $\bar{E}_s = 6/(1-0.5^2) \text{ kPa}$ ,  $t = 2.5 \mu\text{m}$ , and  $\bar{E}_f = E_f/(1-0.5^2)$ , where  $E_f$  is the Young's modulus and taking Poisson's ratio as 0.5.
- Obtained from the data sheet provided by Momentive Inc.
  - A. J. Nolte, M. F. Rubner and R. E. Cohen, *Macromolecules*, 2005, **38**, 5367–5370.
  - P. Zheng and T. J. McCarthy, *J. Am. Chem. Soc.*, 2012, **134**, 2024–7.

#### 2. Aspect ratio as a function of applied strain for bare wavy substrate without top films

The wavy substrate without the top film localizes at relatively small applied strain. The surface localizes and forms a crease-like topography at low applied strains (~0.1).

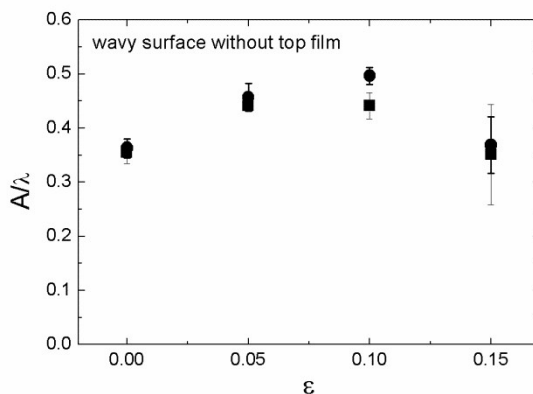

Figure S1. The aspect ratio as a function of strain for the bare substrate without the top film.

### 3. Wrinkle wavelength and the number of layers

In the molding experiment, the top film thickness is controlled so that the wavelength matches the wavelength of the pre-molded surfaces. The wavelength obtained on 40:1 PDMS and 30:1 PDMS is proportional to the number of layers as shown in figure S1.

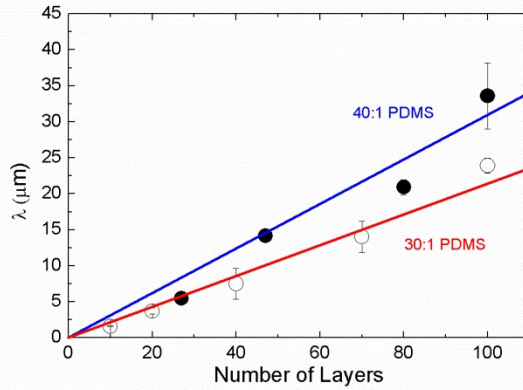

Figure S2. Wavelength as a function of layer number. This plot is used to determine how many layers are to be used for a given wavelength.

### 4. Different $A_m/\lambda_m$ used in Fig. 6 for the post-curing experiment.

Table. S2. Amplitude and wavelength used in Fig. 6 for the post-curing experiment

| $A_m$ | $\lambda_m$ | $(A_m/\lambda_m)^2$ | $A_F$ | $\lambda_F$ | $(\lambda_F/\lambda_m)(A_F/\lambda_F)^2$ |
|-------|-------------|---------------------|-------|-------------|------------------------------------------|
| 0     | 60.0*       | 0                   | 25.3  | 46.2        | 0.23                                     |
| 9.3   | 43.1        | 0.046               | 17.5  | 25.1        | 0.28                                     |
| 9.6   | 43.2        | 0.049               | 19.5  | 29.3        | 0.30                                     |
| 12.3  | 37.9        | 0.11                | 19.0  | 27.9        | 0.34                                     |
| 27.0  | 54.0        | 0.25                | 34.1  | 39.0        | 0.55                                     |

\*obtained by applying a strain slightly above the critical strain.

In Fig. S3, We provide the aspect ratio changes for different  $A_m/\lambda_m$  used. It is very likely that the post-curing step introduce thermal stress to the material. Thus, the aspect ratio increases by the post-curing step. The aspect ratios before and after the post-curing step are both included in the plot. Note that the aspect ratio before post-curing is used as  $A_m/\lambda_m$ .

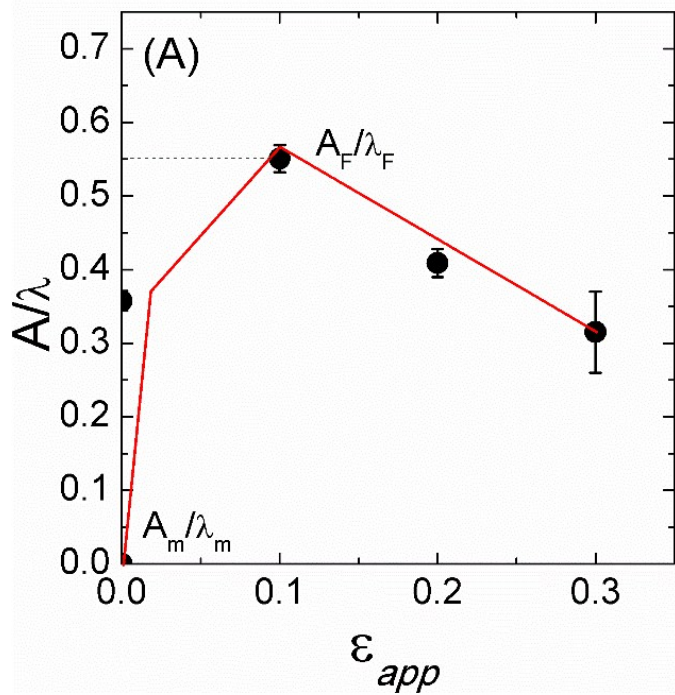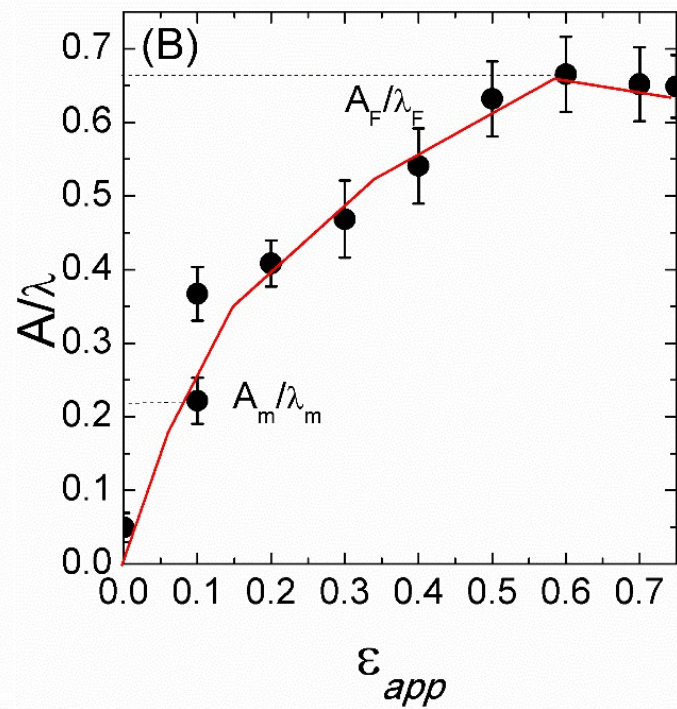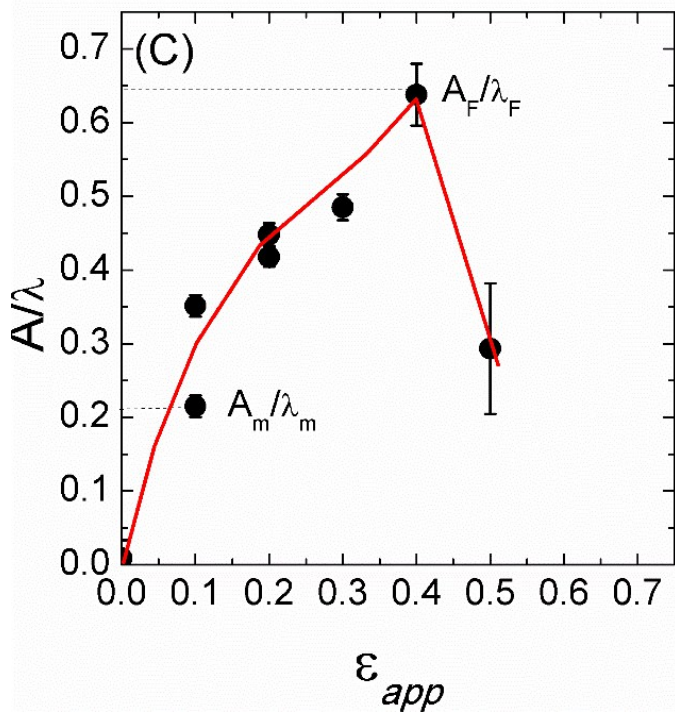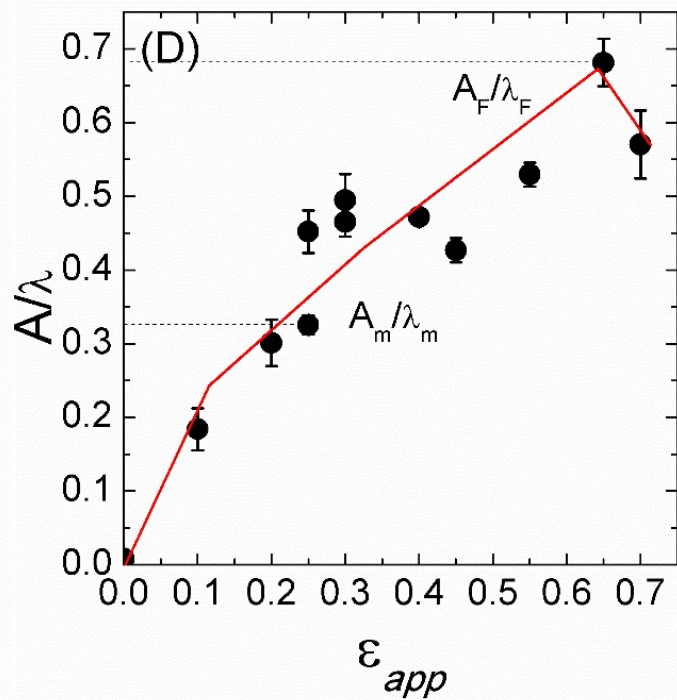

Figure S3. Post-curing experiments of different values of  $A_m/\lambda_m$ . The red solid lines are only for guiding of eyes.
